# Supplementary material
Source: publisher figshare collection journal article supplement (https://acs.figshare.com/ndownloader/files/4075522)
Supplement: Supplementary file 1 [file 4075522]

## Supporting Information For:

# Advanced Oxidation Kinetics and Mechanism of Preservative Propylparaben Degradation in Aqueous Suspension of TiO<sub>2</sub> as well as Risk Assessment of Its Degradation Products

Hansun Fang,<sup>†</sup>, || Yanpeng Gao,<sup>†</sup>, || Guiying Li,<sup>†</sup> Jibin An,<sup>†</sup>, || Po-Keung Wong,<sup>‡</sup> Haiying Fu,<sup>§</sup> Side Yao,<sup>§</sup> Xiangping Nie, <sup>⊥</sup> and Taicheng An<sup>\*,†</sup>

\*Corresponding Author: **Prof. Taicheng An**: Tel +86-20-85291501; E-mail [antc99@gig.ac.cn](mailto:antc99@gig.ac.cn)

**Numbers of pages: 33**

### Tables:

- Table S1** Direct photolysis and photocatalytic degradation of PPB influenced by TiO<sub>2</sub> dosage, PPB concentration and pH value.
- Table S2** Experimental conditions, purpose, and the rate constants for photocatalytic degradation of PPB with various scavengers' addition.
- Table S3** Compounds identified by UPLC/MS/MS (a) and SPE/GC/MS (b) during the photocatalytic degradation of PPB.
- Table S4** The absolute bimolecular reaction rate constants of HO<sup>•</sup> with propylparaben, ethylparaben and 4-hydrobenzoic acid obtained by both pulse radiolysis and the competitive method.

### Figures:

- Figure S1** Kinetics observed for N<sub>2</sub>O-saturated 120 μM KSCN solutions at 480 nm with different PPB concentrations. Inset represents the competitive plot as a function of the PPB/KSCN relative concentration with a slope of 0.73.
- Figure S2** Difference adsorption spectra generated from the reaction of 400 μM PPB with <sup>•</sup>N<sub>3</sub> saturated with N<sub>2</sub>O at different time intervals. Inset represents the plot of the pseudo-first-order transient formation rate constants at 420 nm vs. different PPB concentrations in the reaction with <sup>•</sup>N<sub>3</sub>.

- Figure S3** Photolysis and photocatalytic degradation of 100  $\mu\text{M}$  PPB with different  $\text{TiO}_2$  dosages (a), with different initial PPB concentrations (b), with different pH values (c).
- Figure S4** Reciprocal of initial degradation rate ( $1/r$ ) against the reciprocal of initial concentration of PPB ( $1/C$ ).
- Figure S5** The adsorption efficiencies of PPB onto  $\text{TiO}_2$  photocatalyst surface stirred in the dark for 30 min at different pH values.
- Figure S6** Effect of pH on variation of PPB molecular ratio.
- Figure S7** Schematic representation of the photocatalytic processes taking place at a  $\text{TiO}_2$  photocatalyst surface under UV irradiation.
- Figure S8** TIC chromatogram and the retention times of products obtained by UPLC/MS/MS with  $\text{ESI}^-$  mode for (a) 100  $\mu\text{M}$  PPB and (b) photocatalytic degradation sample of 100  $\mu\text{M}$  PPB at 40 min.
- Figure S9** TIC chromatogram and the retention times of products obtained by SPE/GC/MS for (a) pure water and (b) photocatalytic degradation sample of 100  $\mu\text{M}$  PPB at 40 min.
- Figure S10** Fragmentation patterns for products identified by UPLC/MS/MS.
- Figure S11** Fragmentation patterns for products identified by SPE/GC/MS.
- Figure S12** TIC chromatogram and the fragmentation patterns of 20  $\mu\text{M}$  HB obtained by UPLC/MS/MS with  $\text{ESI}^-$  mode.
- Figure S13** Dose response curve of  $17\beta$ -estradiol.
- Figure S14** (a) and (c). Difference adsorption spectra of the transient generated from the reaction of 300  $\mu\text{M}$  EPB (a) and 300  $\mu\text{M}$  HB (c) saturated with  $\text{N}_2\text{O}$ . Inset represents the plot of the pseudo-first-order transient formation rate constants at 390 nm (a) or 380 nm (c) vs. different substrate concentrations; (b) and (d). Kinetics observed for  $\text{N}_2\text{O}$ -saturated 120  $\mu\text{M}$  KSCN at 480 nm with different concentrations of EPB (b) and HB (d). Inset represents the competitive plot as a function of the Substrate/KSCN relative concentration.

## Experimental Details

**Photocatalytic Degradation Experiments.** Photocatalytic degradation of PPB was performed in a Pyrex reactor with a 125 W high-pressure mercury lamp as a light source. Prior to illumination, a suspension of 150 mL 100  $\mu$ M PPB with various contents of photocatalyst (Degussa P25) was stirred in the dark for 30 min to achieve the adsorption-desorption equilibrium. 3.0 mL reaction solutions were sampled at required intervals and filtered through 0.2  $\mu$ m Millipore membrane for later analysis. The concentration of PPB was measured by Agilent 1200 series high performance liquid chromatography (HPLC) with photodiode array detector set at 255 nm. Separation was achieved on an Agilent C18 column (4.6 $\times$ 250 mm, 5  $\mu$ m particle diameter) 10  $\mu$ L filtered sample was injected for analysis. The eluent was a mixture of 70% methanol and 30% ultra-pure water containing 10 mM  $\text{KH}_2\text{PO}_4$  with 0.8 mL min<sup>-1</sup> flow-rate.

## ■ RESULTS AND DISCUSSION

### The optimization of photocatalytic degradation of PPB in water

The most widely used Langmuir-Hinshelwood (L-H) model was used to describe the photocatalytic degradation kinetics with the value of pseudo-first-order rate constant as shown in Eq. (1)<sup>1</sup>:

$$\ln \frac{C_t}{C_0} = k_1 t \quad (1)$$

where  $k_1$  is the pseudo-first-order rate constant ( $\text{min}^{-1}$ ),  $t$  is the photocatalytic degradation time (min), and  $C_0$  and  $C_t$  refer to the concentration of PPB ( $\mu\text{M}$ ) at the beginning and at the photocatalytic time  $t$ , respectively.

Kinetics studies suggested that PPB can be photocatalytic degraded quickly within 120 min in suspension of  $\text{TiO}_2$ . The photocatalytic degradation of PPB can fit the L-H model well within 60 min photocatalytic degradation with little influence of the products under all the experimental conditions. Hence, to understand the adsorptive property on the photocatalytic degradation of PPB, a transformed L-H model was employed to analyze the data obtained at different initial concentrations of PPB as shown in Eq. (2).<sup>2</sup>

$$\frac{1}{r} = \frac{1}{kKC} + \frac{1}{k} \quad (2)$$

where  $r$  is initial degradation rate ( $\mu\text{M min}^{-1}$ ),  $k$  is intrinsic reaction rate constant ( $\mu\text{M min}^{-1}$ ),  $K$  is the L-H adsorption constant ( $\mu\text{M}^{-1}$ ), and  $C$  is PPB concentration at adsorption equilibrium ( $\mu\text{M}$ ).

Figure S4 shown a plot of Eq. (2), and the value of  $k$  and  $K$  are calculated as  $3.01 \mu\text{M min}^{-1}$  and  $0.03 \mu\text{M}^{-1}$ , respectively. This adsorption constant is close to the values of  $\beta$ -blockers described in our previous paper,<sup>3</sup> indicating that the adsorption performance may also affect

photocatalytic degradation of PPB. To further explore the role of adsorption, the adsorption-desorption equilibrium was also measured within 30 min at various pH conditions based on the assumption that the adsorption performance of PPB onto catalyst could be affected by different pH values.<sup>4, 5</sup> As Figure S5 showed that the adsorption of PPB is more efficient in acid and neutral media (with 2.3%, 5.2% and 5.6% at pH 3.0, 5.0 and 7.0, respectively) than those in alkaline media (with 2.1% and 0% at pH of 9.0 and 11.0, respectively). With pKa value of 8.24,<sup>6</sup> PPB is tend to exist mainly with the neutral form with a small dissociation of PPB which can be adsorbed onto the positive charged catalyst surface below the zero point of TiO<sub>2</sub> (pH value 6.2). On the other hand, with further increase of the pH value above 8.24, PPB was transformed to its anionic form (Figure S6), which is difficult to adsorb onto the negative charged TiO<sub>2</sub>, thus the degradation efficiencies was decrease fast with further increase pH value of solution.

### **UPLC/MS/MS analysis of photocatalytic degradation products**

**m/z 195.** Four products are detected with m/z 195 atomic mass units (amu) with t<sub>R</sub> at 2.32, 2.48, 3.29 and 5.41 min, respectively. An increase of 16 in the m/z molecular ion of parent compound (m/z 179) indicates the monohydroxylation onto the aromatic ring or the propyl ester chain of PPB. The products C and D obtain similar fragment patterns as the parent compound as shown in Figure S9 (a-c), which possess the main ions of m/z 92, 93, 136 and 137. The results indicate that these two products are corresponding to the PPB monohydroxylated onto the propyl ester chain. Furthermore, the ratio of m/z 92 against 93 of the compound with product C is 1.47, lower than that of product D with a value of 6.66. The difference suggests that the O-H bond adducted to the alkyl chain of the former is more easily

dehydrogenated as compared with the latter under the same negative ionization condition. Hence, the 1-Hydroxy-propyl, 4-hydroxybenzoate with a weaker O-H bond is believed to be the compound with  $t_R$  at 2.32 min, and 2-Hydroxy-propyl, 4-hydroxybenzoate are believed to be the other. Figure S9 (d-g) also showed the fragmentation patterns of the compounds E and I. As can be seen, these two compounds are characterized with the fragment ion  $m/z$  108, which is 16 amu higher than the main fragment ion of PPB with  $m/z$  92, indicating the monohydroxylated adduct onto the aromatic ring. Furthermore, the fragments  $m/z$  152 and 153 are only detected for the compound I, and with the same collision energy (CE=12 V). This compound possess a relative low abundance of  $m/z$  108, indicating that an enhanced interatomic force such as the intramolecular hydrogen bonding may be introduced to this compound through the monohydroxylation process. Hence, the 2-hydroxy-propyl paraben with a carbonyl substituent at the ortho position is supposed to be the structure of compound I, while the other is identified as the 3-hydroxy-propyl paraben.

**$m/z$  211.** Three products are detected at  $m/z$  211 with  $t_R$  at 1.42, 3.95 and 4.61min, and the fragmentation patterns are given in Figure S9 (h-l). An increase of 16 amu in the  $m/z$  molecular ion of  $m/z$  195 indicates that dihydroxylated products are formed during the further photocatalytic oxidation process of PPB. The main fragmentation ions of the compound B are  $m/z$  93 and 137 without  $m/z$  108 and 109, presenting the characteristic fragments of the products hydroxylated at the alkyl chain as mentioned above. Hence, compound B is proposed to be the 1,2-dihydroxy-propyl, 4-hydroxybenzoate, which probably comes from the further oxidation of 1-Hydroxy-propyl, 4-hydroxybenzoate or 2-Hydroxy-propyl, 4-hydroxybenzoate with  $\text{HO}^\bullet$ . The relatively short retention time of this compound also

suggested its high hydrophilicity after hydroxylation onto the alkyl chain. The fragmentation ions  $m/z$  109 and 92 are observed from the compounds G and H. The  $m/z$  109 is proposed to be the fragment ion of dihydroxybenzene, while the  $m/z$  92 is the 17 amu less than  $m/z$  109, indicating the loss of a -OH. Besides the -OH on the aromatic ring, the other 16 amu increase is probably due to the hydroxylation onto the alkyl chain. Hence, further study on fragmentation patterns of the two compound with lower collision energy ( $CE=10V$ ) is performed as shown in plot [Figure S9 \(i\)](#) and [\(k\)](#). As can be seen, the ratio of  $m/z$  136 against 137 of **products** G and H are 1.54 and 2.97, respectively, suggesting that the former possess a O-H bond adducted to the alkyl chain which is more easily dehydrogenated. The fragment ion intensity of  $m/z$  193 of **product** H is stronger than that with **product** G, and the 18 amu decrease is due to the lose of a  $H_2O$ , suggesting the former obtains a more stable O-H bond on the alkyl chain that could not be easily ionized. Hence, the 1-hydroxy-propyl, dihydroxybenzoate and 2-hydroxy-propyl, dihydroxybenzoate are proposed as the structures of the **products** with  $t_R$  at 3.95 and 4.61 min, respectively.

**$m/z$  193.** One **product** is detected at  $m/z$  193 with  $t_R$  at 3.61 min, a decrease by 2 amu of the monohydroxylated **products** ( $m/z$  195). The main fragments of this **product** are  $m/z$  92 and  $m/z$  136 as shown in [Figure S9 \(m\)](#), which are similar with the fragment patterns of **products** C, D and PPB. The 2 amu loss is probably attribute to the replacement of -OH with carbonyl group ( $=O$ ) on the alkyl chain. Further more, the fragment ion of  $m/z$  149 indicates that this **product** is probably the  $\beta$ -ketone compound. Hence, the structure is proposed as 2-ketone-propyl, 4-hydroxybenzoate.

**m/z 137.** One **product** is detected at m/z 137 with  $t_R$  at 0.97min with its fragmentation pattern in [Figure S9 \(n\)](#). This compound is identified as 4-hydroxybenzoic acid, which is confirmed by the authorized standard on the aspects of the fragmentation patterns as well as the retention time ([Figure S11](#)).



**Table S1** Direct photolysis and photocatalytic degradation of PPB influenced by TiO<sub>2</sub> dosage, PPB concentration and pH value.

| Experimental conditions                         |      | $k_1$ (min <sup>-1</sup> ) | R <sup>2</sup> | Half life (min) |
|-------------------------------------------------|------|----------------------------|----------------|-----------------|
| Direct photolysis                               | -    | 0.0002                     | 0.952          | 3465.7          |
| TiO <sub>2</sub> dosage<br>(g L <sup>-1</sup> ) | 0.5  | 0.0187                     | 0.992          | 37.1            |
|                                                 | 1.0  | 0.0237                     | 0.991          | 29.2            |
|                                                 | 2.0  | 0.0272                     | 0.989          | 25.5            |
|                                                 | 3.0  | 0.0293                     | 0.991          | 23.7            |
|                                                 | 4.0  | 0.0301                     | 0.989          | 22.8            |
| PPB concentration<br>(μM)                       | 20   | 0.1962                     | 0.966          | 3.5             |
|                                                 | 50   | 0.0640                     | 0.972          | 10.8            |
|                                                 | 100  | 0.0272                     | 0.992          | 25.5            |
|                                                 | 200  | 0.0142                     | 0.996          | 48.8            |
| pH value                                        | 3.0  | 0.0286                     | 0.995          | 24.2            |
|                                                 | 5.0  | 0.0281                     | 0.999          | 24.7            |
|                                                 | 7.0  | 0.0271                     | 0.993          | 25.6            |
|                                                 | 9.0  | 0.0239                     | 0.994          | 29.0            |
|                                                 | 11.0 | 0.0091                     | 0.999          | 76.2            |

**Table S2** Experimental conditions, purpose, and the rate constants for photocatalytic degradation of PPB with various scavengers' addition.

| Experimental conditions                             | Purpose                                                                               | $k_1$ (min <sup>-1</sup> ) |
|-----------------------------------------------------|---------------------------------------------------------------------------------------|----------------------------|
| No scavengers                                       | /                                                                                     | 0.0272                     |
| 0.1 M Isopropanol                                   | Quench HO <sup>•</sup> <sup>3</sup>                                                   | 0.0042                     |
| 0.1 M Methanol                                      | Quench HO <sup>•</sup> and h <sup>+</sup> <sup>7</sup>                                | 0.0023                     |
| 0.1 M KI                                            | Quench h <sup>+</sup> and HO <sup>•</sup> <sub>ads</sub> <sup>8</sup>                 | 0.0080                     |
| 0.1 mM NaF                                          | Increase HO <sup>•</sup> <sub>bulk</sub> <sup>9</sup>                                 | 0.0514                     |
| Dissolved in MeCN                                   | Exclude HO <sup>•</sup> <sup>10, 11</sup>                                             | 0.0188                     |
| 50 μM K <sub>2</sub> Cr <sub>2</sub> O <sub>7</sub> | Quench e <sup>-</sup> <sub>aq</sub> <sup>12</sup>                                     | 0.0056                     |
| 0.1 M KI + 0.1 M isopropanol + N <sub>2</sub>       | Reserve only e <sup>-</sup> <sub>aq</sub> <sup>13</sup>                               | 0.0004                     |
| 0.1 M KI + 0.1 M isopropanol + O <sub>2</sub>       | Reserve oxidative species except for HO <sup>•</sup> and h <sup>+</sup> <sup>14</sup> | 0.0089                     |
| 10 μM Fe (II)-EDTA                                  | Quench H <sub>2</sub> O <sub>2</sub> <sup>13, 15</sup>                                | 0.0195                     |

**Table S3** Compounds identified by UPLC/MS/MS (a) and SPE/GC/MS (b) during the photocatalytic degradation of PPB.

| Products |                                         | t <sub>R</sub><br>(min)                 | Molecule<br>weight | Supposed structure                                                                    | LC <sub>50</sub> (Daphnid)<br>mg L <sup>-1</sup> | EC <sub>50</sub> (Green algae)<br>mg L <sup>-1</sup> |
|----------|-----------------------------------------|-----------------------------------------|--------------------|---------------------------------------------------------------------------------------|--------------------------------------------------|------------------------------------------------------|
| (A)      | 4-Hydroxybenzoic acid <sup>*</sup>      | 0.97 <sup>a</sup>                       | 138                | 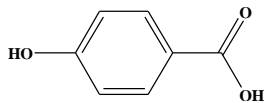   | 159.249                                          | 776.856                                              |
| (B)      | 1, 2-Dihydroxy-propyl,4-hydroxybenzoate | 1.42 <sup>a</sup>                       | 212                |    | 91.635                                           | 493.210                                              |
| (C)      | 1-Hydroxy-propyl,4-hydroxybenzoate      | 2.32 <sup>a</sup>                       | 196                |    | 19.345                                           | 93.277                                               |
| (D)      | 2-Hydroxy-propyl,4-hydroxybenzoate      | 2.48 <sup>a</sup><br>26.31 <sup>b</sup> | 196                |    | 21.292                                           | 103.402                                              |
| (E)      | 2-Hydroxypropyl paraben                 | 3.29 <sup>a</sup><br>23.88 <sup>b</sup> | 196                |   | 107.363                                          | 1.721                                                |
| (F)      | 2-Ketone-propyl,4-hydroxybenzoate       | 3.61 <sup>a</sup><br>16.04 <sup>b</sup> | 194                |  | 21.389                                           | 103.988                                              |
| (G)      | 1-Hydroxy-propyl,dihydroxybenzoate      | 3.95 <sup>a</sup>                       | 212                |  | 859.013                                          | 2.227                                                |

|     |                                    |                                         |     |                                                                                     |         |       |
|-----|------------------------------------|-----------------------------------------|-----|-------------------------------------------------------------------------------------|---------|-------|
| (H) | 2-Hydroxy-propyl,dihydroxybenzoate | 4.61 <sup>a</sup>                       | 212 | 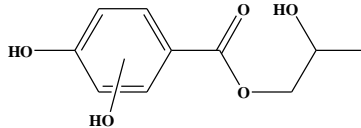 | 978.295 | 2.261 |
| (I) | 3-Hydroxypropyl paraben            | 5.41 <sup>a</sup><br>17.78 <sup>b</sup> | 196 |  | 11.646  | 1.332 |
| (J) | Dihydroxybenzene                   | 13.66 <sup>b</sup>                      | 110 |  | 255.855 | 1.141 |
| (K) |                                    | 22.91 <sup>b</sup>                      |     |                                                                                     |         |       |

\* Authentic standards are available

**Table S4** The absolute bimolecular reaction rate constants of  $\text{HO}^\bullet$  with propylparaben, ethylparaben and 4-hydrobenzoic acid obtained by both pulse radiolysis and the competitive method.

| Name                | $k_T (\text{M}^{-1} \text{s}^{-1})$ | $k_A (\text{M}^{-1} \text{s}^{-1})$ | $k_H (\text{M}^{-1} \text{s}^{-1})$ | $k_H \%$ |
|---------------------|-------------------------------------|-------------------------------------|-------------------------------------|----------|
| Propylparaben       | $7.70 \pm 0.38 \times 10^9$         | $4.65 \pm 0.23 \times 10^9$         | $3.05 \pm 0.15 \times 10^9$         | 39.6     |
| Ethylparaben        | $7.12 \pm 0.36 \times 10^9$         | $5.36 \pm 0.27 \times 10^9$         | $1.76 \pm 0.09 \times 10^9$         | 24.7     |
| 4-Hydrobenzoic acid | $6.65 \pm 0.33 \times 10^9$         | $7.07 \pm 0.35 \times 10^9$         | $< 0.69 \times 10^9$                | $< 9.8$  |

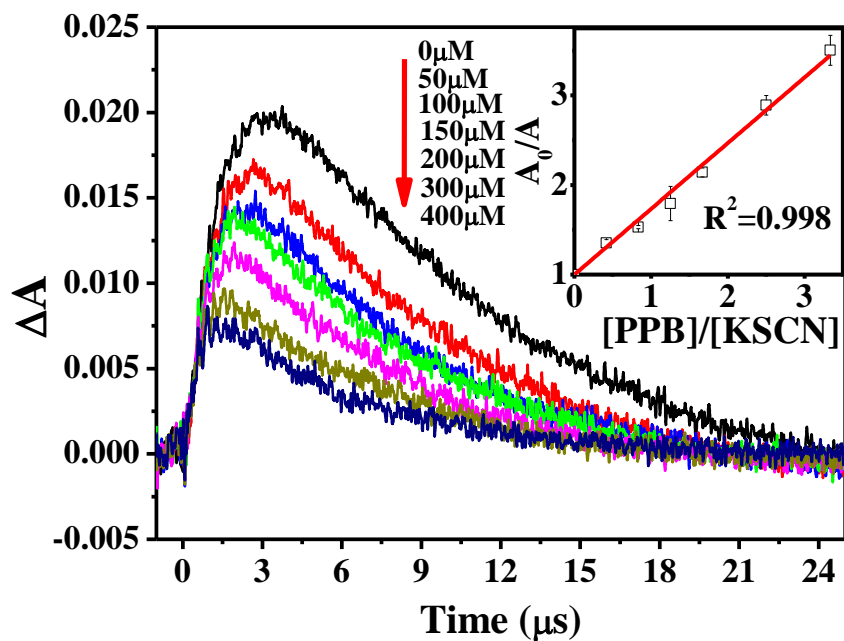

**Figure S1** Kinetics observed for  $\text{N}_2\text{O}$ -saturated  $120\ \mu\text{M}$  KSCN solutions at  $480\ \text{nm}$  with different PPB concentrations. Inset represents the competitive plot as a function of the PPB/KSCN relative concentration with a slope of 0.73.

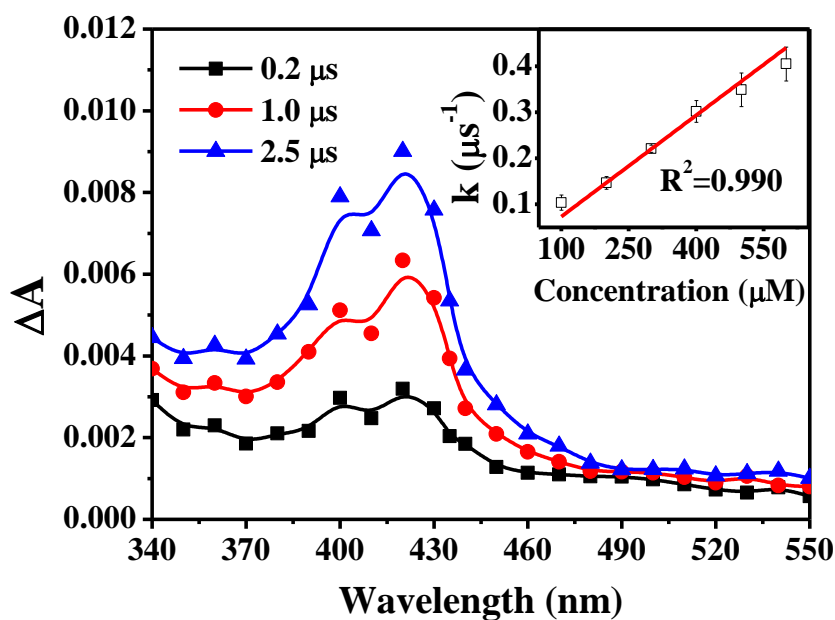

**Figure S2** Difference adsorption spectra generated from the reaction of  $400\ \mu\text{M}$  PPB with  $\cdot\text{N}_3$  saturated with  $\text{N}_2\text{O}$  at different time intervals. Inset represents the plot of the pseudo-first-order transient formation rate constants at  $420\ \text{nm}$  vs. different PPB concentrations in the reaction with  $\cdot\text{N}_3$ .

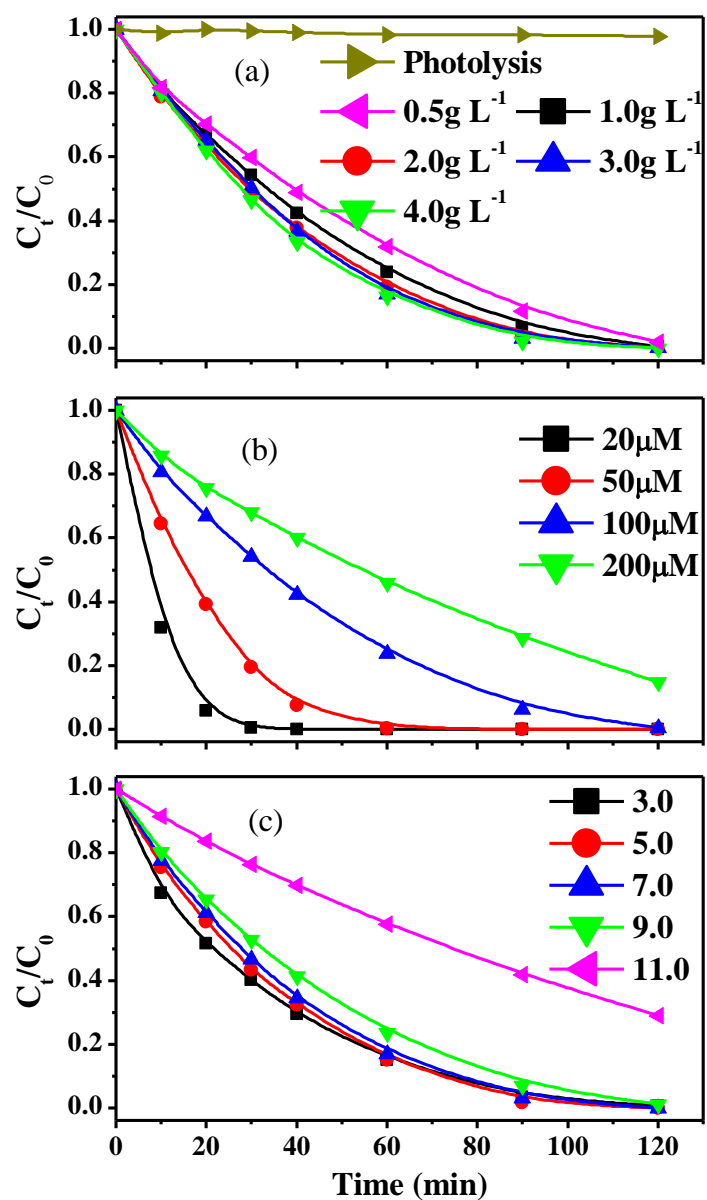

**Figure S3** Photolysis and photocatalytic degradation of 100  $\mu\text{M}$  PPB with different  $\text{TiO}_2$  dosages (a), with different initial PPB concentrations (b), with different pH values (c).

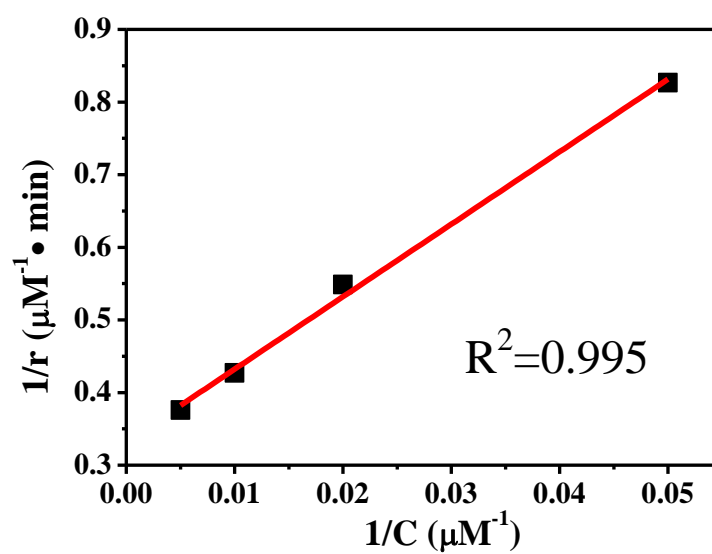

**Figure S4** Reciprocal of initial degradation rate ( $1/r$ ) against the reciprocal of initial concentration of PPB ( $1/C$ ).

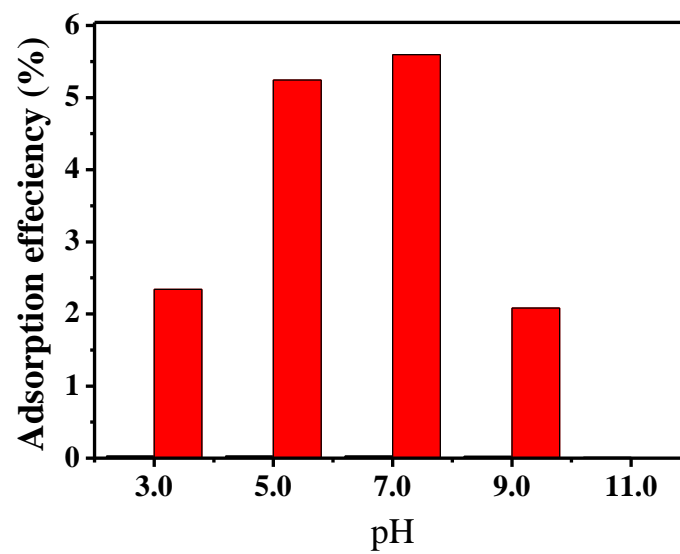

**Figure S5** The adsorption efficiencies of PPB onto  $\text{TiO}_2$  photocatalyst surface stirred in the dark for 30 min at different pH values.



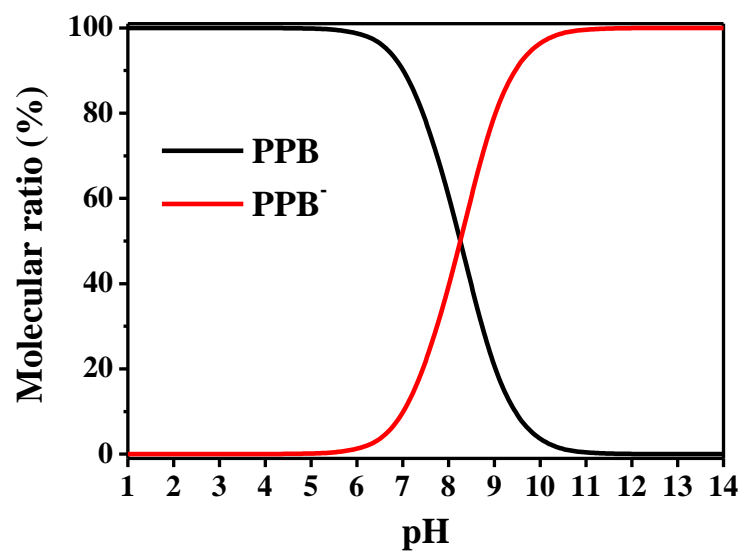

**Figure S6** Effect of pH on variation of PPB molecular ratio.



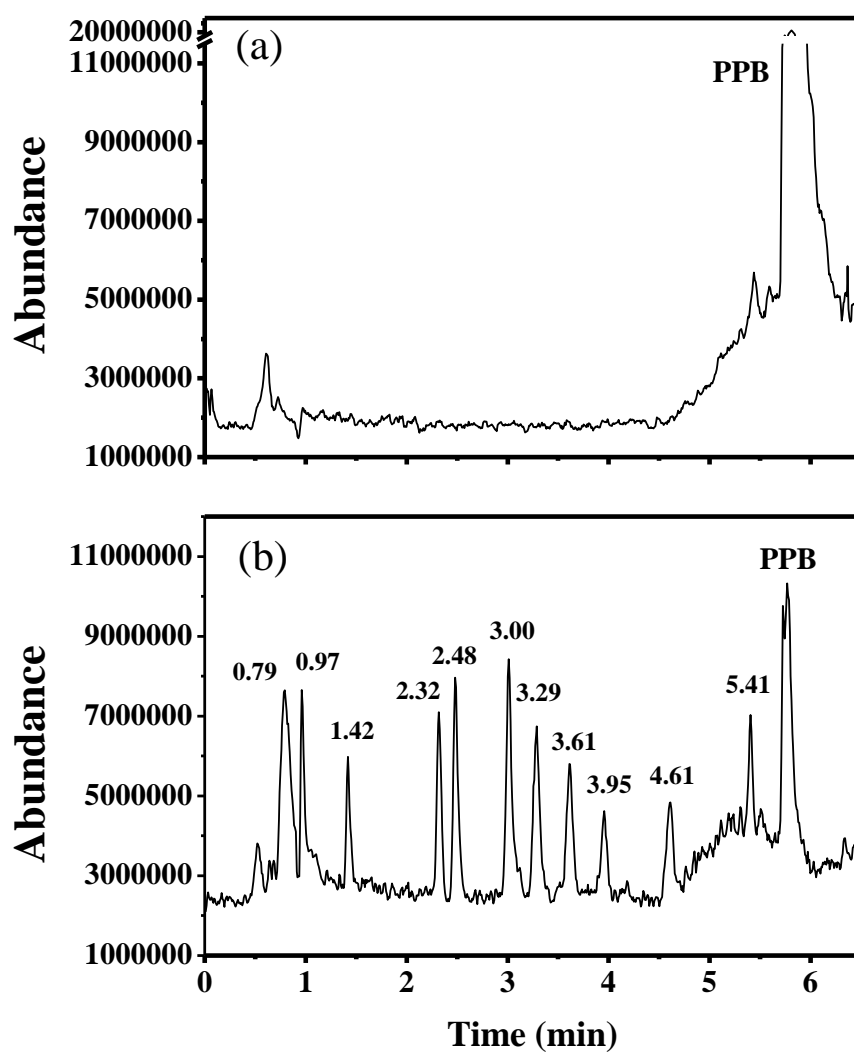

**Figure S8** TIC chromatogram and the retention times of **products** obtained by UPLC/MS/MS with ESI mode for (a) 100  $\mu$ M PPB and (b) photocatalytic degradation sample of 100  $\mu$ M PPB at 40 min.

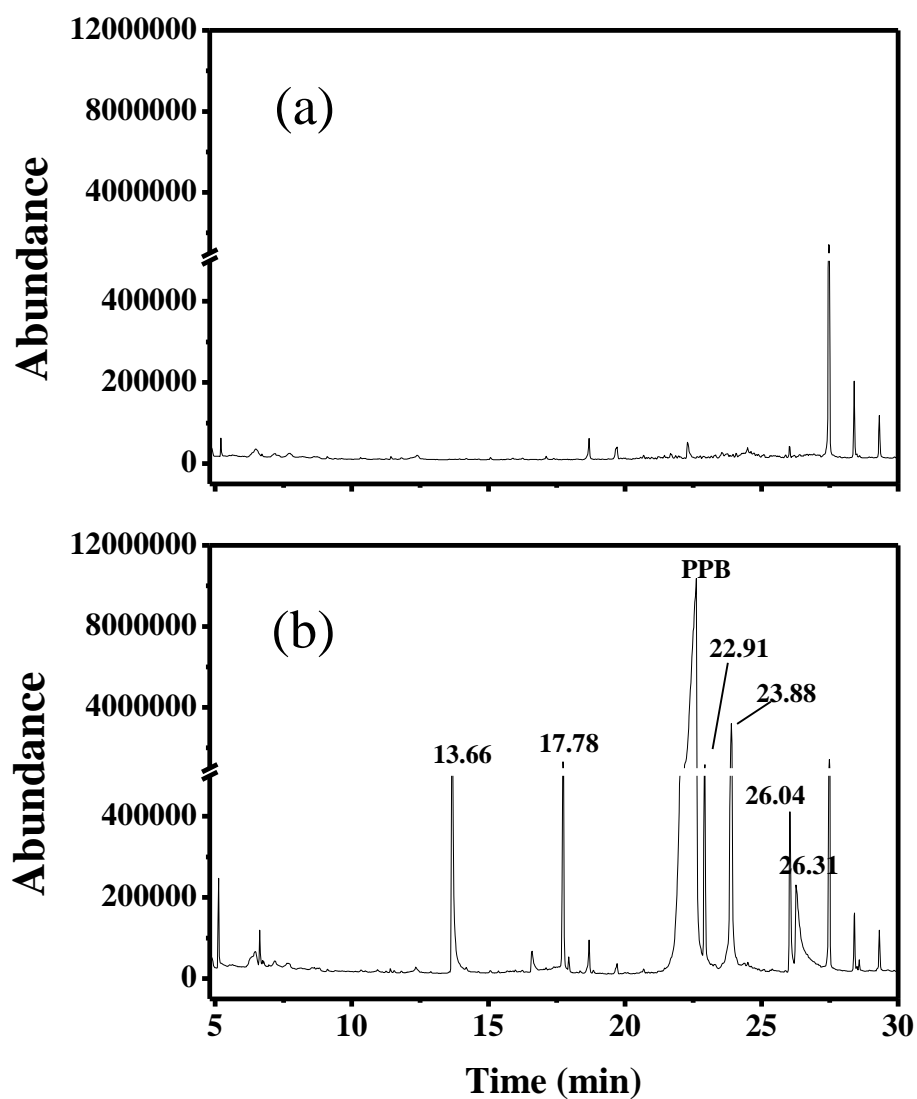

**Figure S9** TIC chromatogram and the retention times of **products** obtained by SPE/GC/MS for (a) pure water and (b) photocatalytic degradation sample of 100  $\mu$ M PPB at 40 min.

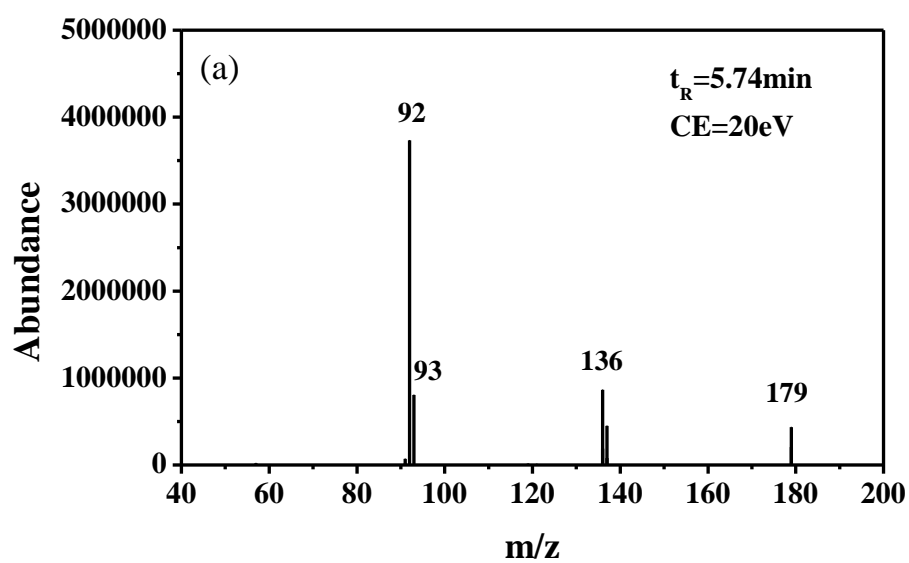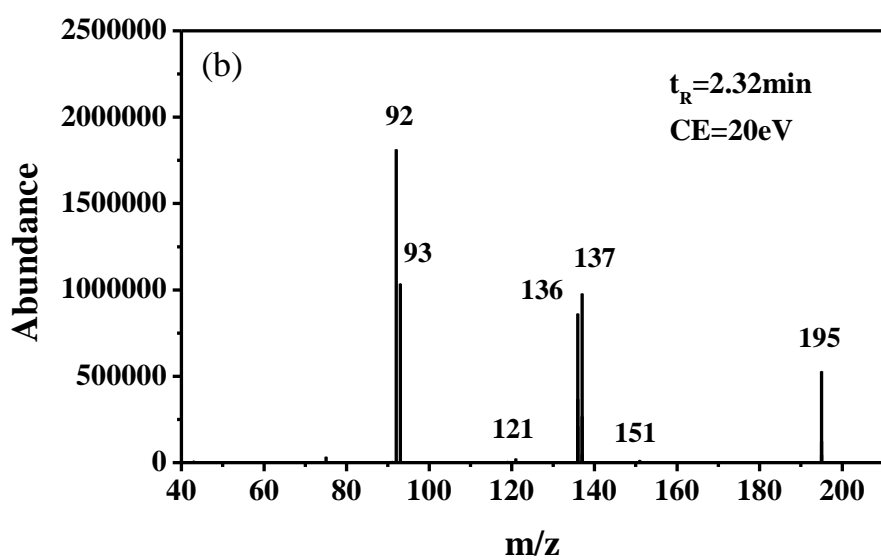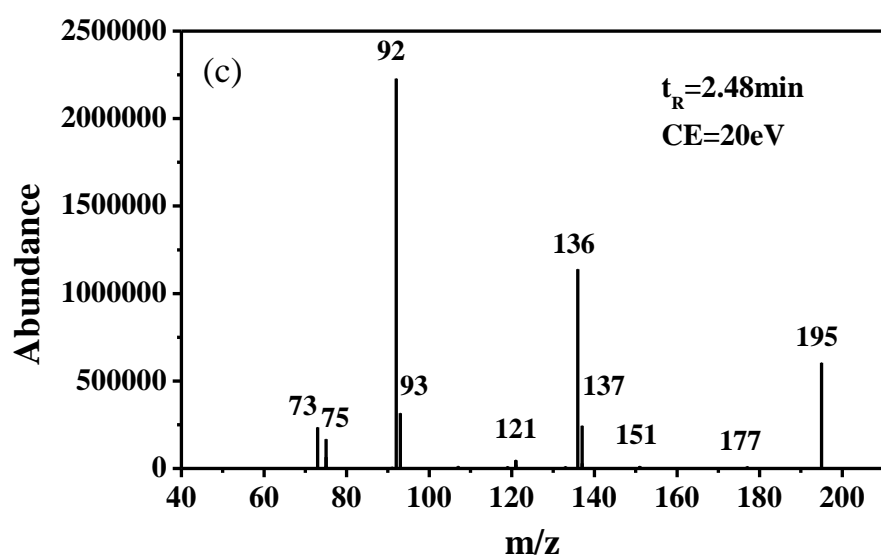

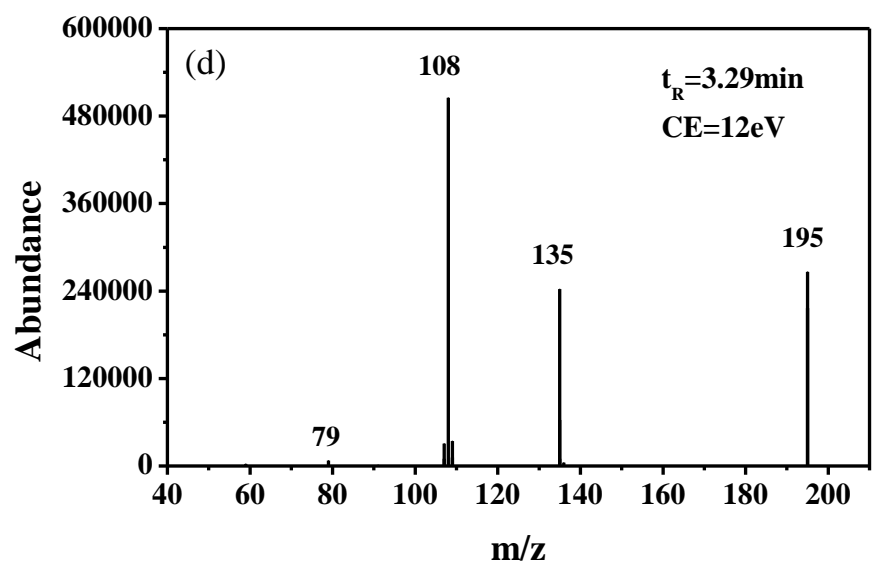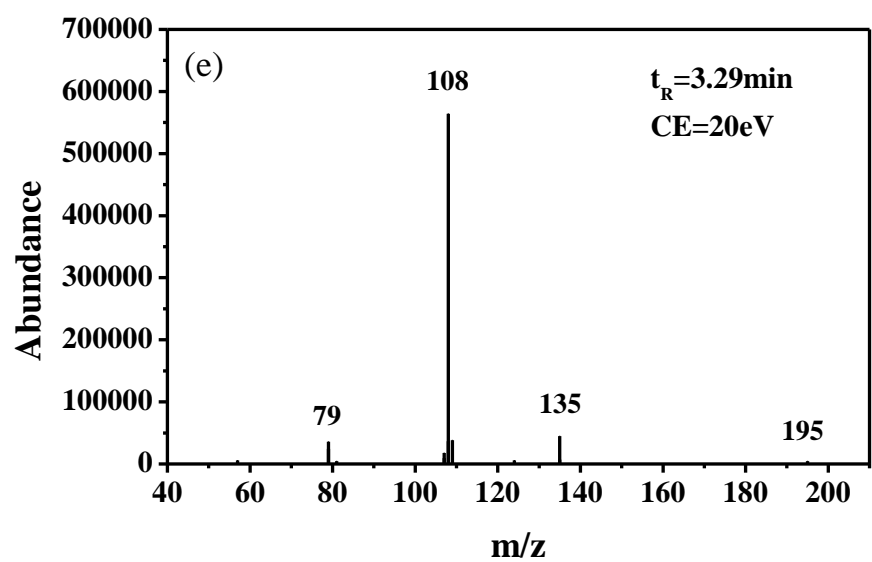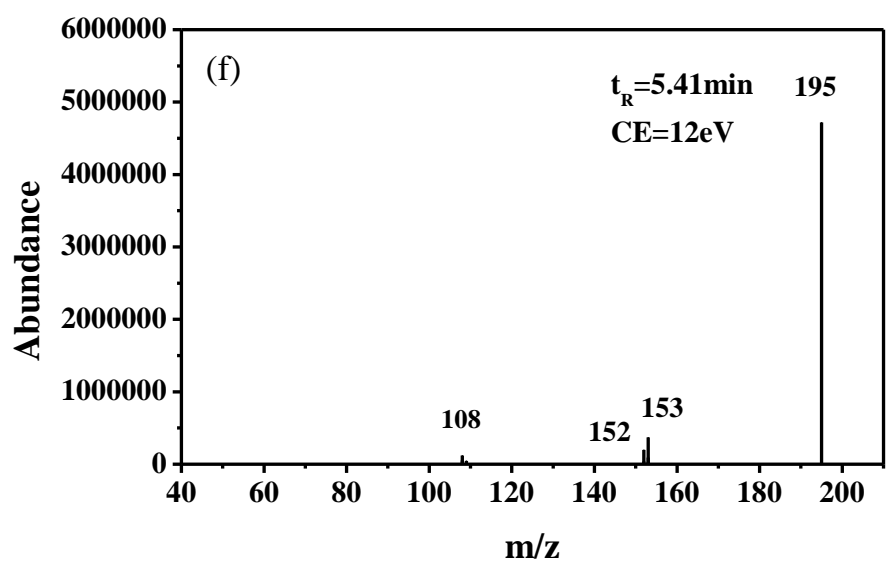

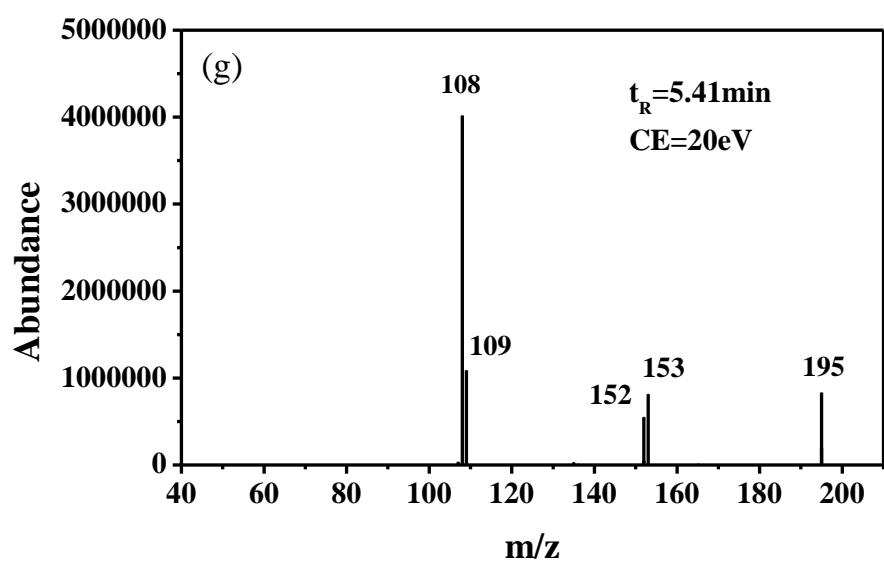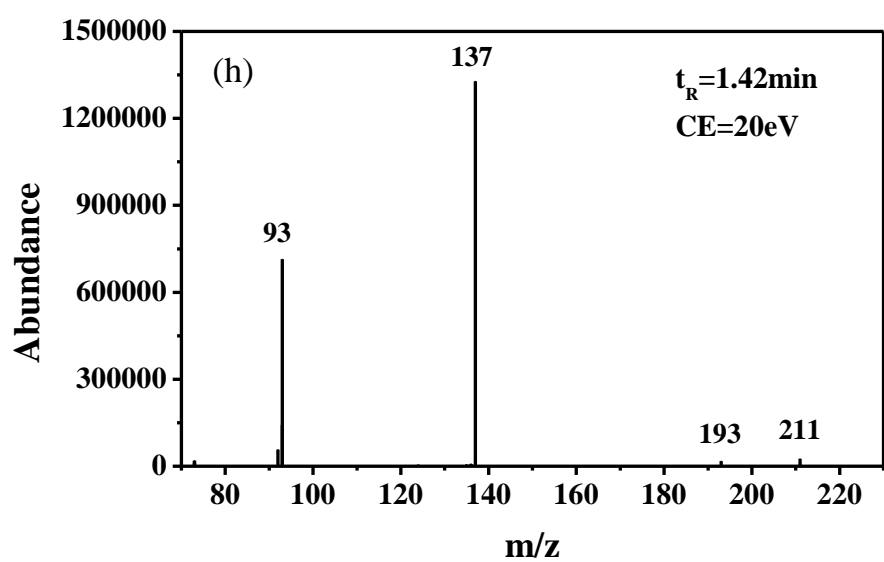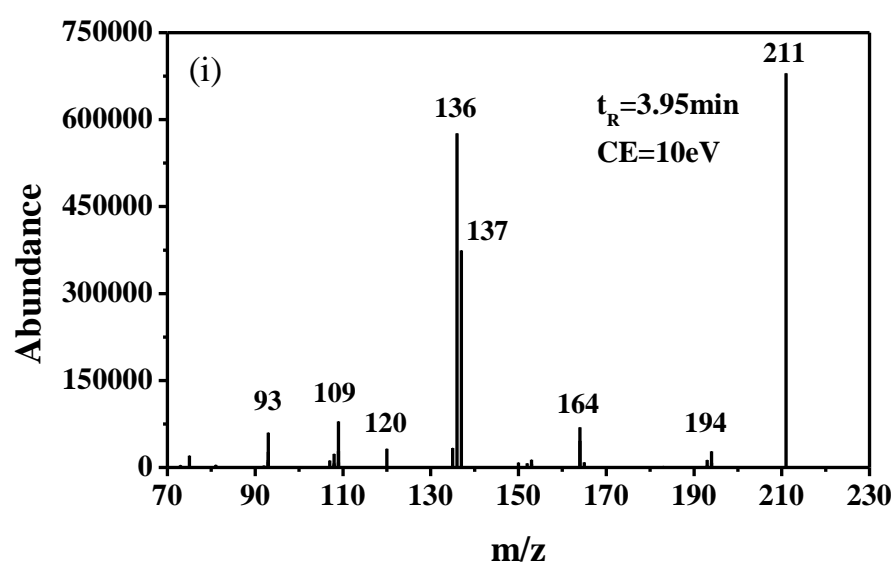

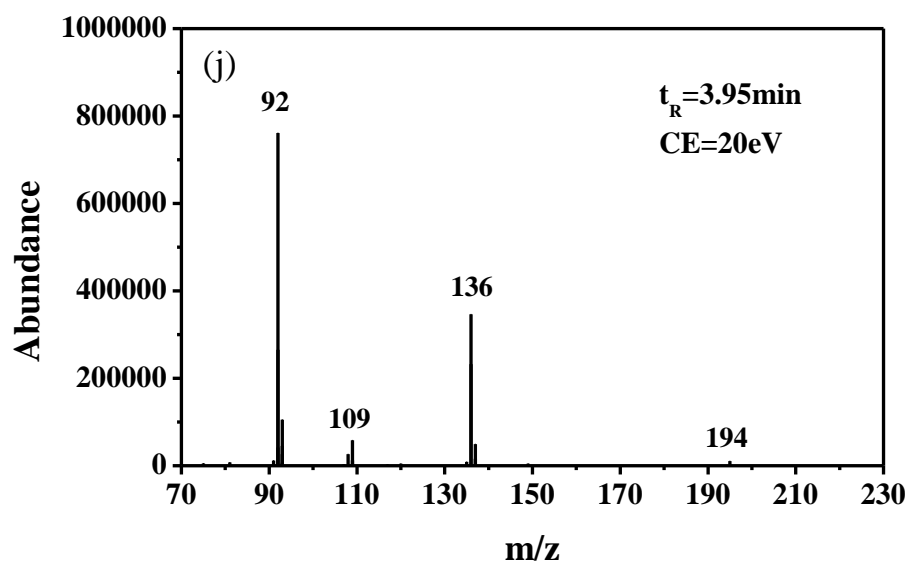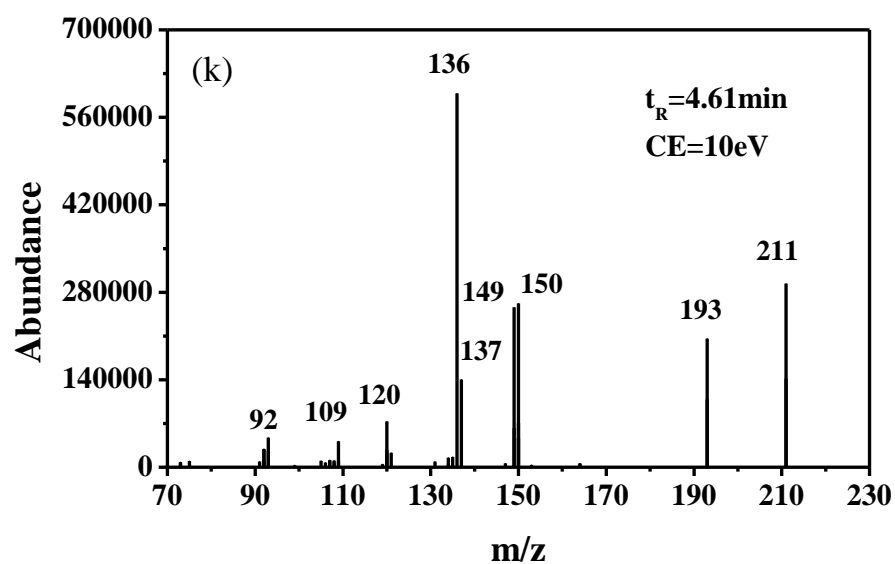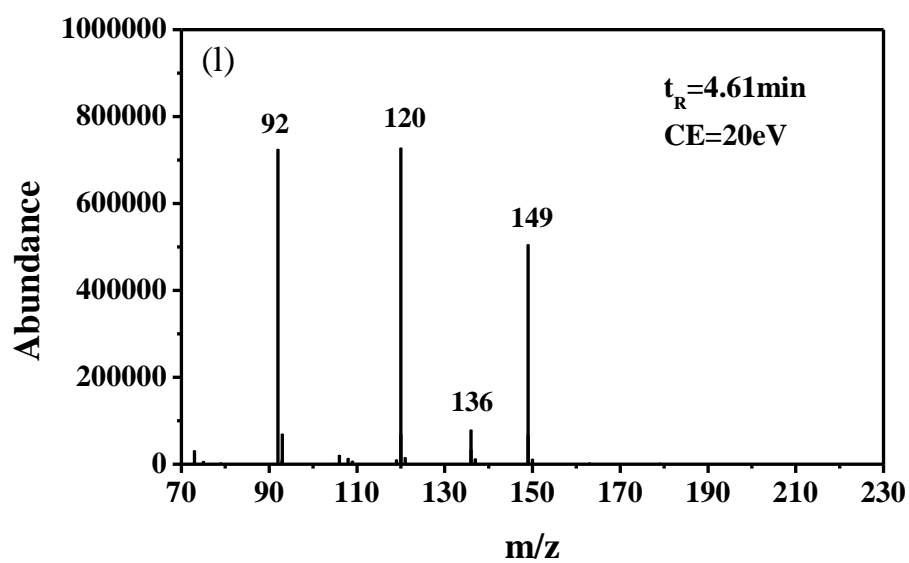



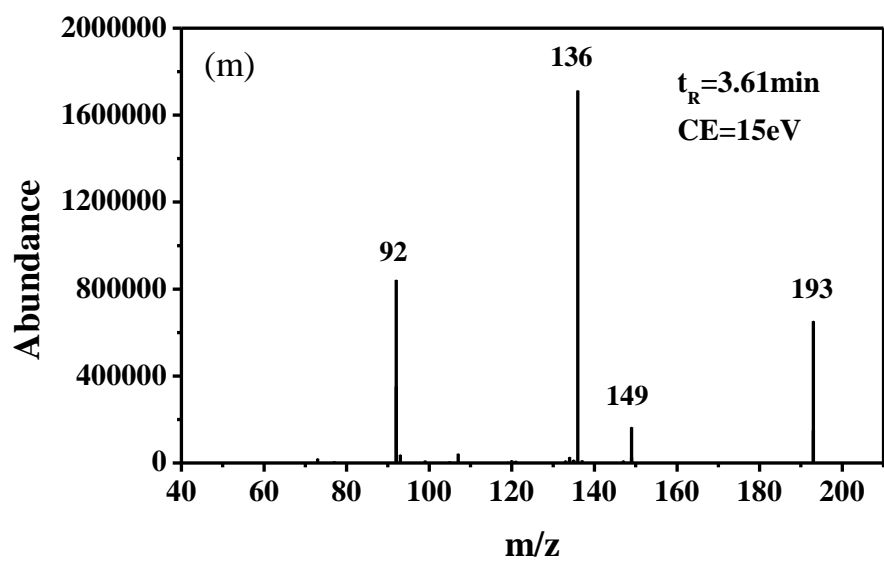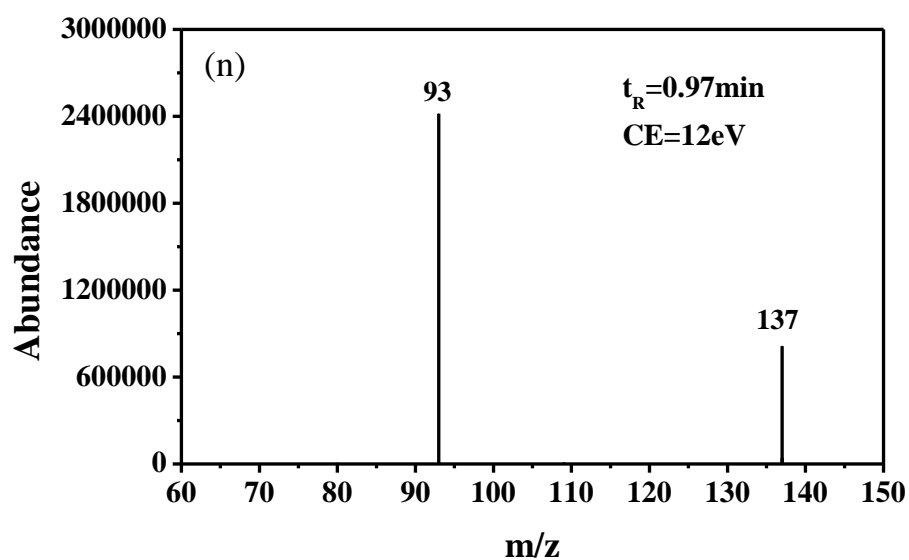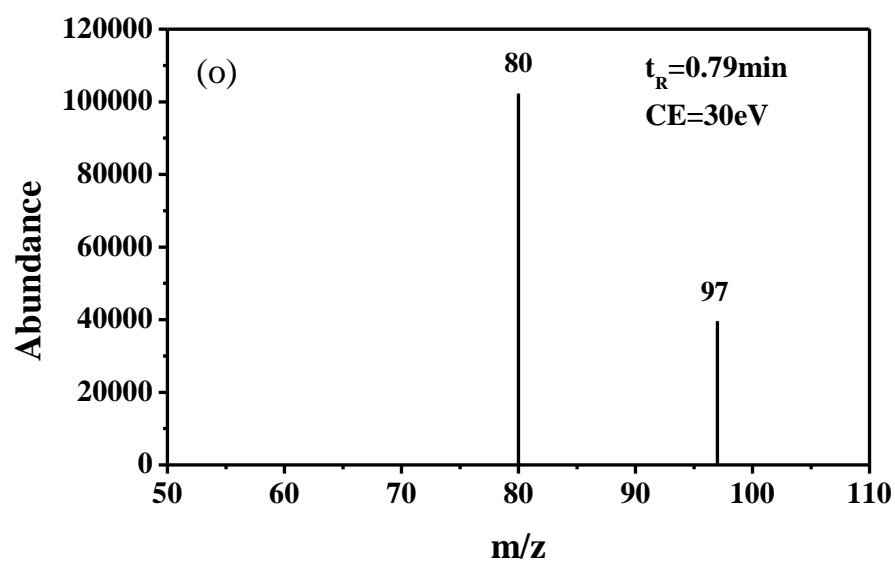

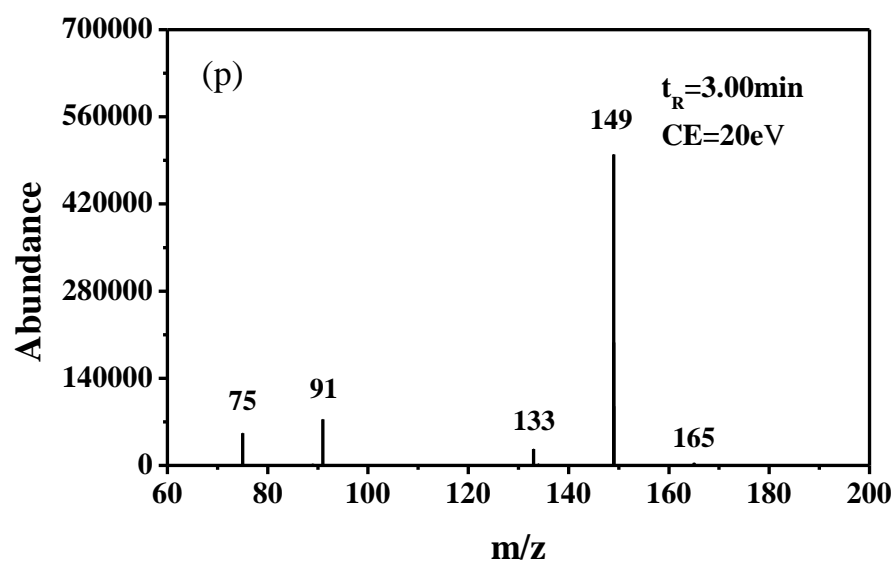

**Figure S10** Fragmentation patterns for **products** identified by UPLC/MS/MS.

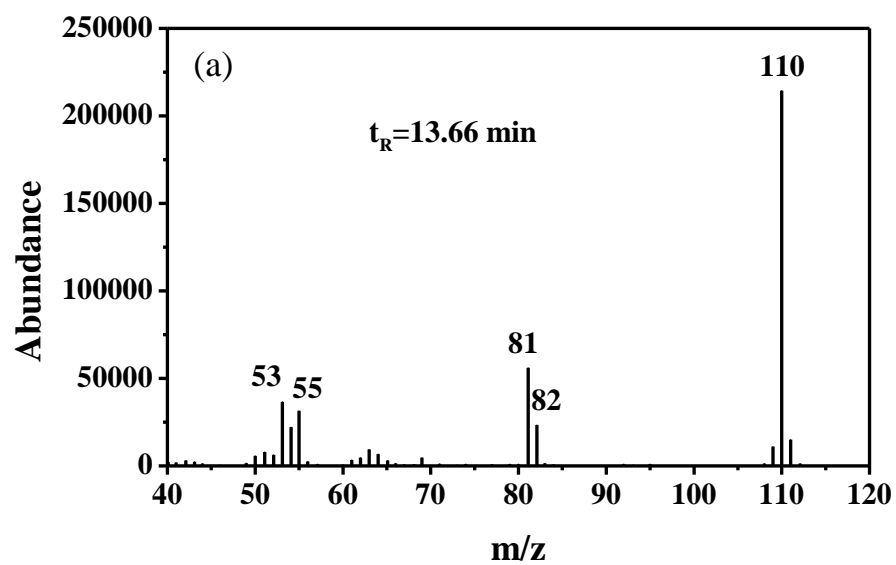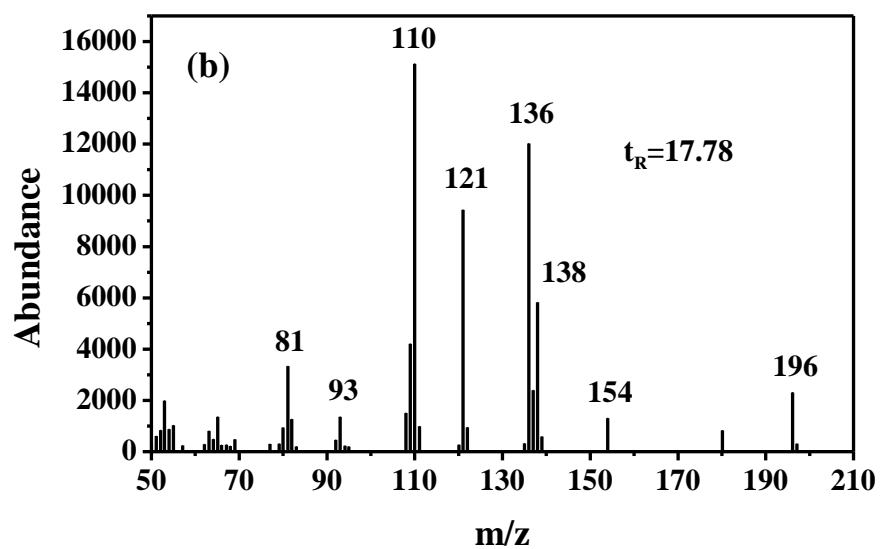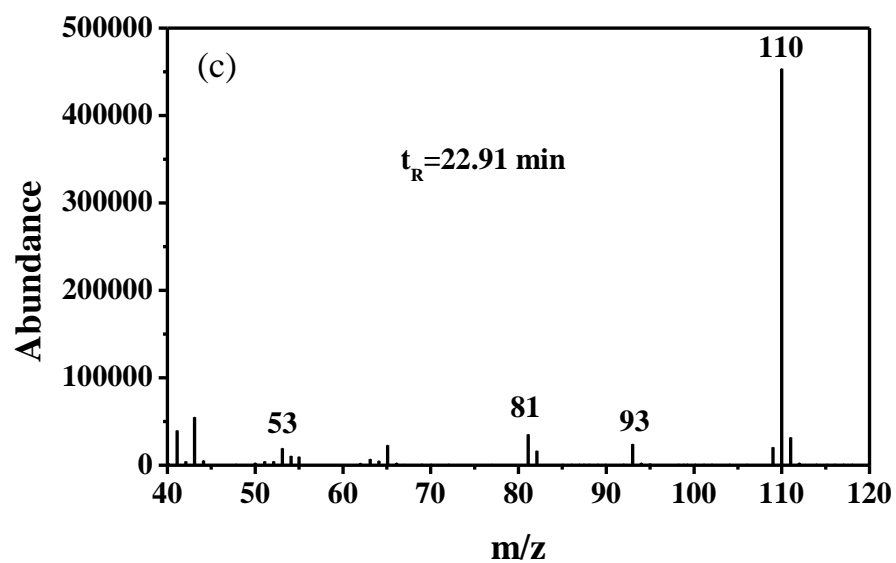

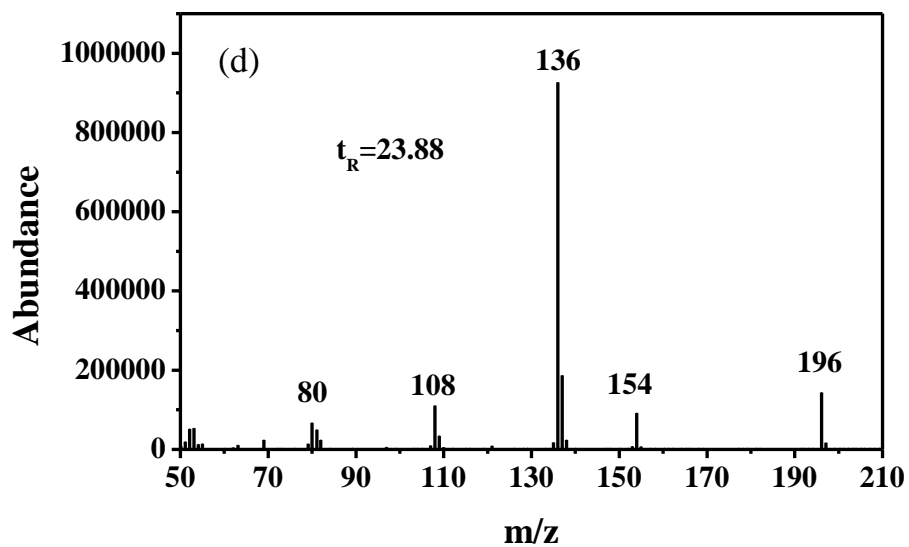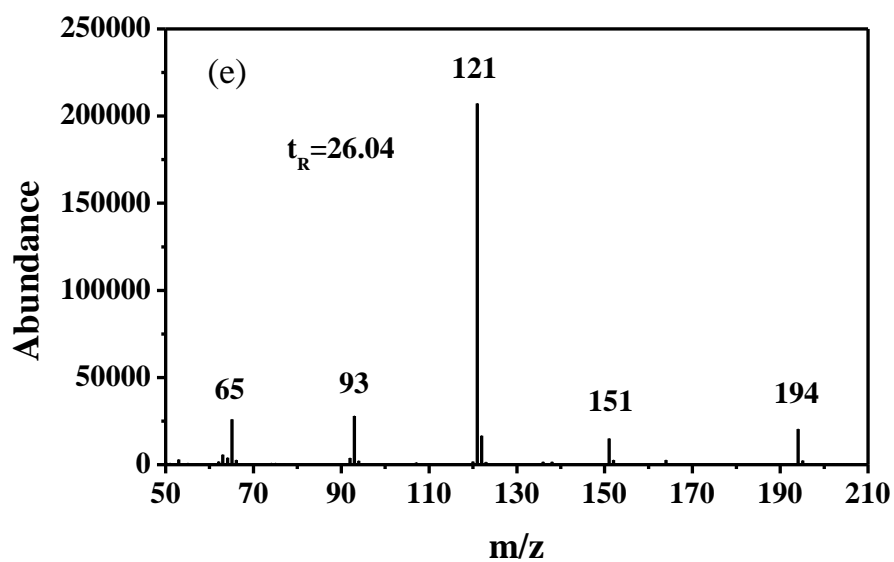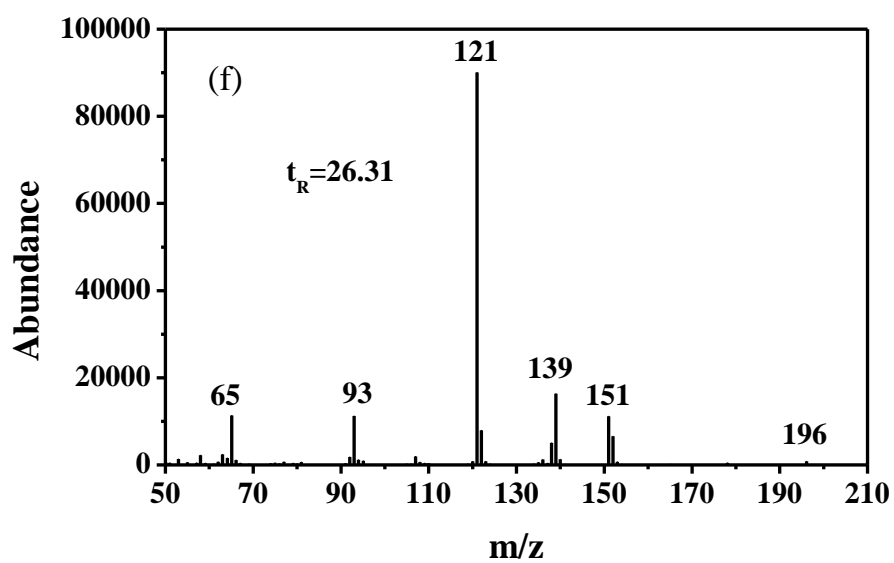

Figure S11 Fragmentation patterns for **products** identified by SPE/GC/MS.

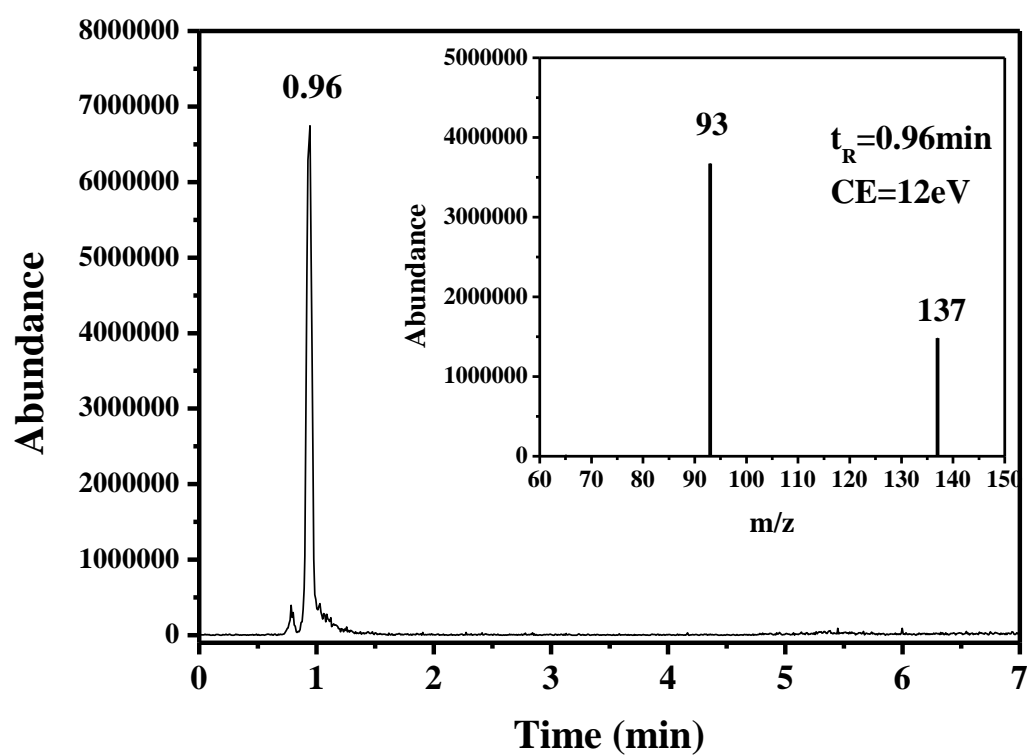

**Figure S12** TIC chromatogram and the fragmentation patterns of 20  $\mu\text{M}$  HB obtained by UPLC/MS/MS with ESI<sup>-</sup> mode.

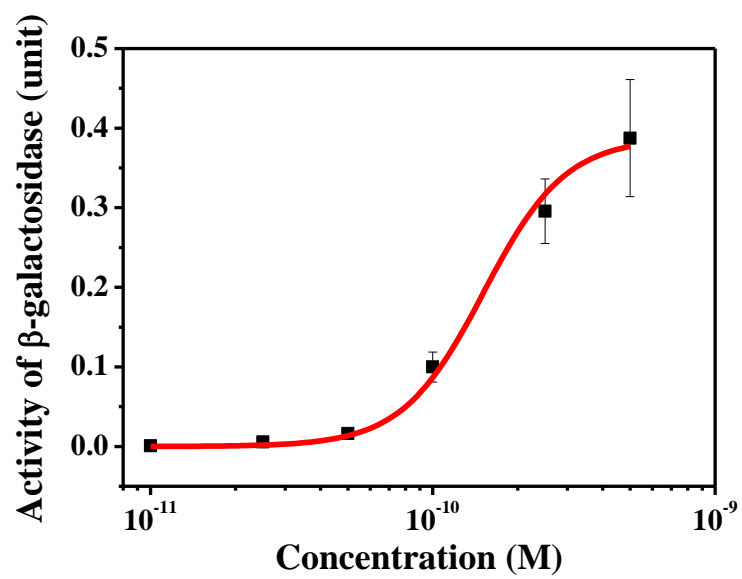

**Figure S13** Dose response curve of 17β-estradiol.

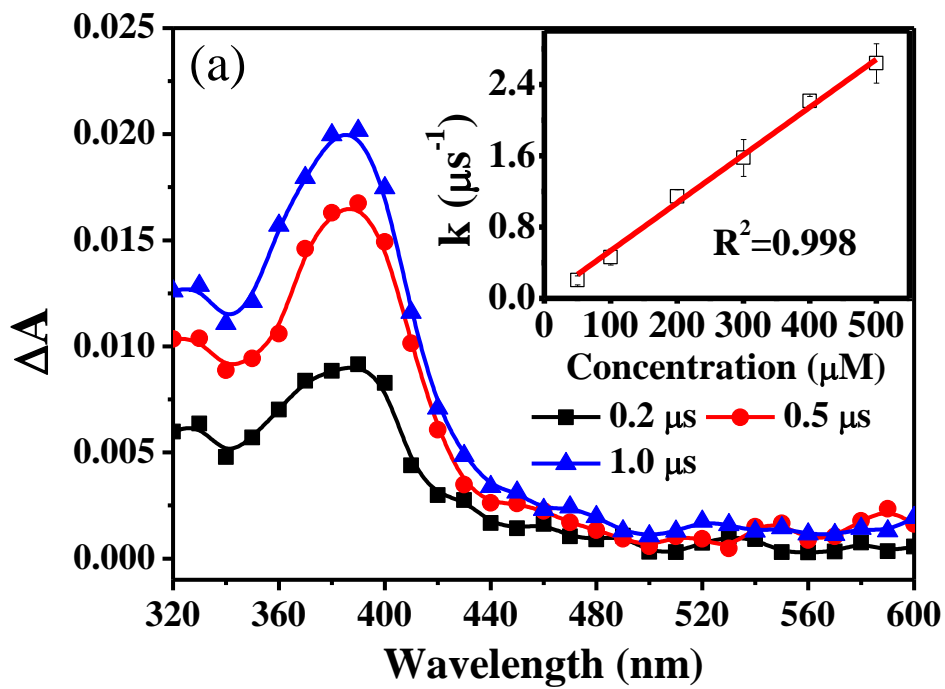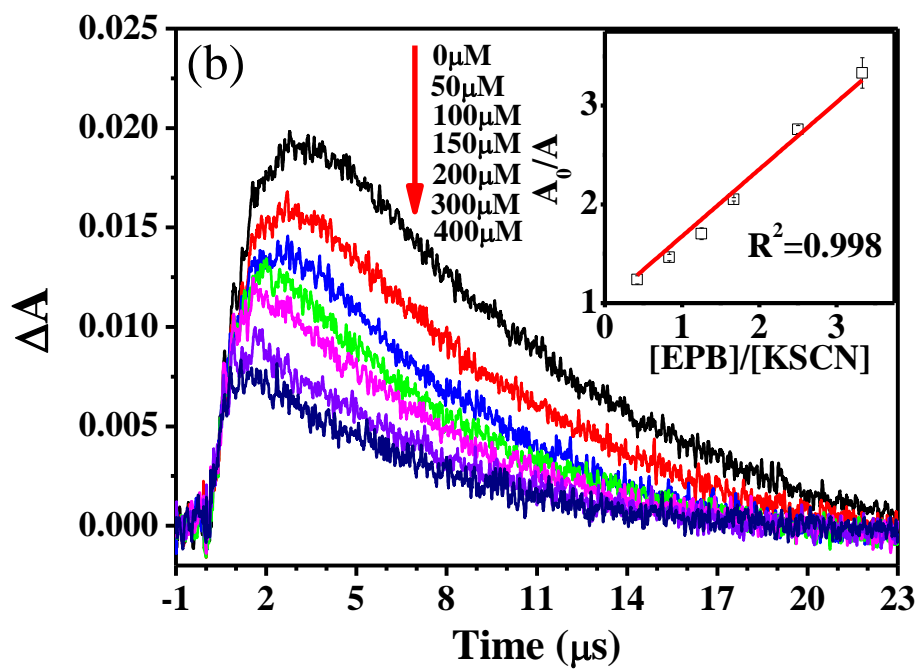

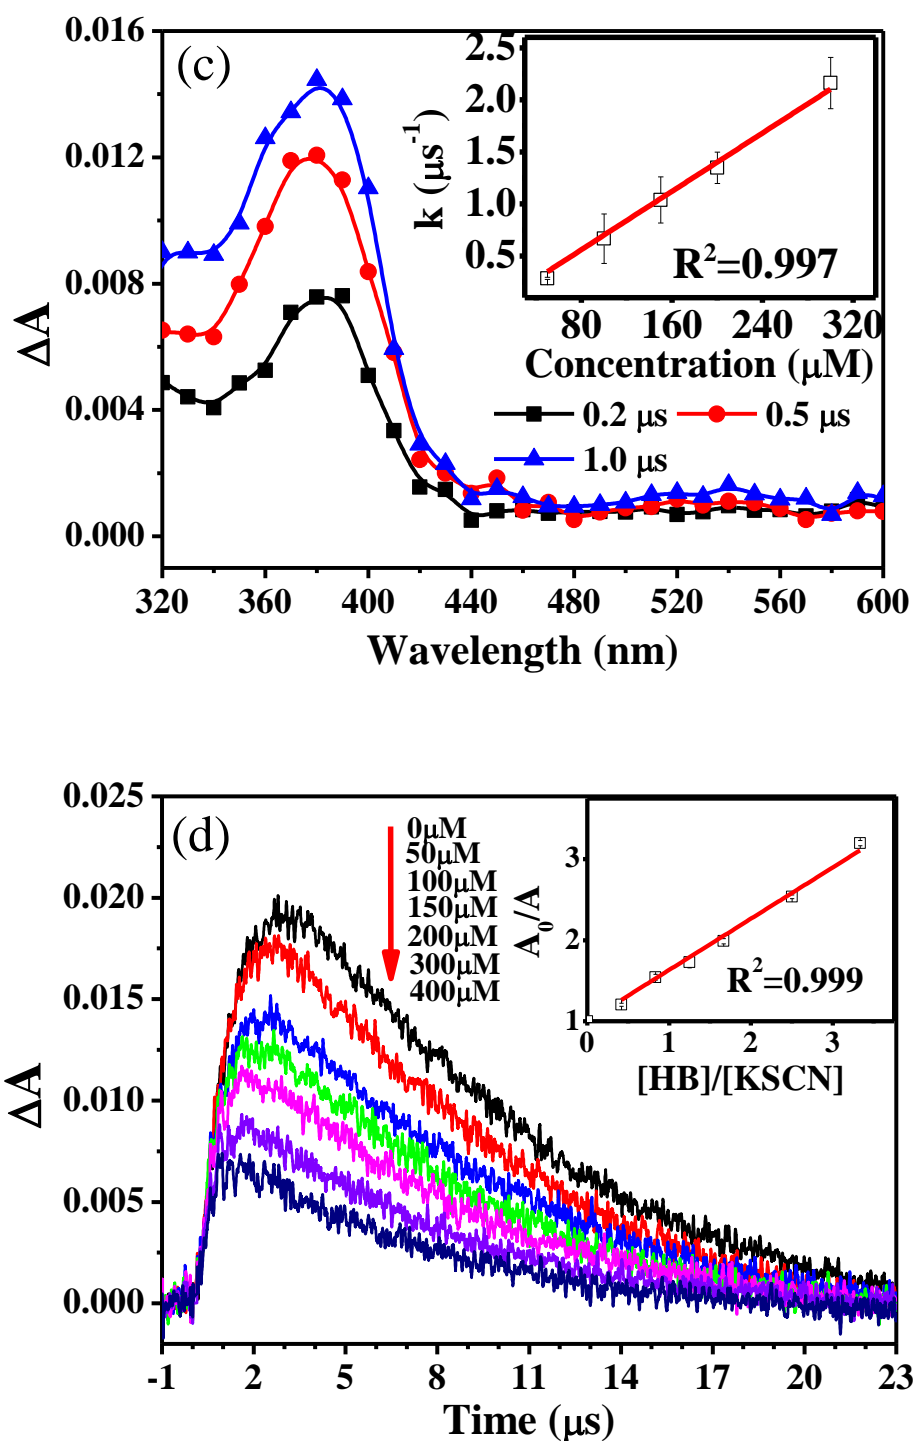

**Figure S14** (a) and (c). Difference adsorption spectra of the transient generated from the reaction of 300  $\mu\text{M}$  EPB (a) and 300  $\mu\text{M}$  HB (c) saturated with  $\text{N}_2\text{O}$ . Inset represents the plot of the pseudo-first-order transient formation rate constants at 390 nm (a) or 380 nm (c) vs. different substrate concentrations; (b) and (d). Kinetics observed for  $\text{N}_2\text{O}$ -saturated 120  $\mu\text{M}$  KSCN at 480 nm with different concentrations of EPB (b) and HB (d). Inset represents the competitive plot as a function of the Substrate/KSCN relative concentration.



## References

- (1) Yang, H.; Li, G. Y.; An, T. C.; Gao, Y. P.; Fu, J. M. Photocatalytic degradation kinetics and mechanism of environmental pharmaceuticals in aqueous suspension of TiO<sub>2</sub>: A case of sulfa drugs. *Catal. Today* **2010**, *153* (3-4), 200-207; DOI: 10.1016/j.cattod.2010.02.068.
- (2) Lin, Y. X.; Ferronato, C.; Deng, N. S.; Chovelon, J. M. Study of benzylparaben photocatalytic degradation by TiO<sub>2</sub>. *Appl. Catal. B-Environ.* **2011**, *104* (3-4), 353-360; DOI 10.1016/j.apcatb.2011.03.006.
- (3) Yang, H.; An, T. C.; Li, G. Y.; Song, W. H.; Cooper, W. J.; Luo, H. Y.; Guo, X. D. Photocatalytic degradation kinetics and mechanism of environmental pharmaceuticals in aqueous suspension of TiO<sub>2</sub>: A case of beta-blockers. *J. Hazard. Mater.* **2010**, *179* (1-3), 834-839; DOI 10.1016/j.jhazmat.2010.03.079.
- (4) Tsai, W. T.; Lee, M. K.; Su, T. Y.; Chang, Y. M. Photodegradation of bisphenol-A in a batch TiO<sub>2</sub> suspension reactor. *J. Hazard. Mater.* **2009**, *168* (1), 269-275; DOI 10.1016/j.jhazmat.2009.02.034.
- (5) Zheng, S.; Cai, Y.; O'Shea, K. E. TiO<sub>2</sub> photocatalytic degradation of phenylarsonic acid. *J. Photochem. Photobio. A-Chem* **2010**, *210* (1), 61-68; DOI 10.1016/j.jphotochem.2009.12.004.
- (6) Labat, L.; Kummer, E.; Dallet, P.; Dubost, J. P. Comparison of high-performance liquid chromatography and capillary zone electrophoresis for the determination of parabens in a cosmetic product. *J. Pharmaceut. Biomed.* **2000**, *23* (4), 763-769; DOI 10.1016/S0731-7085(00)00358-7.
- (7) Teel, A. L.; Warberg, C. R.; Atkinson, D. A.; Watts, R. J. Comparison of mineral and soluble iron Fenton's catalysts for the treatment of trichloroethylene. *Water Res.* **2001**, *35* (4), 977-984; DOI 10.1016/S0043-1354(00)00332-8.
- (8) El-Morsi, T. M.; Budakowski, W. R.; Abd-El-Aziz, A. S.; Friesen, K. J. Photocatalytic degradation of 1,10-dichlorodecane in aqueous suspensions of TiO<sub>2</sub>: A reaction of adsorbed chlorinated alkane with surface hydroxyl radicals. *Environ. Sci. Technol.* **2000**, *34* (6), 1018-1022; DOI 10.1021/es9907360.
- (9) Minero, C.; Mariella, G.; Maurino, V.; Vione, D.; Pelizzetti, E. Photocatalytic transformation of organic compounds in the presence of inorganic ions. 2. Competitive reactions of phenol and alcohols an a titanium dioxide-fluoride system. *Langmuir* **2000**, *16* (23), 8964-8972; DOI 10.1021/la0005863.
- (10) Muneer, M.; Bahnemann, D.; Qamar, M.; Tariq, M. A.; Faisal, M. Photocatalysed reaction of few selected organic systems in presence of titanium dioxide. *Appl. Catal. A-Gen.* **2005**, *289* (2), 224-230; DOI 10.1016/j.apcata.2005.05.003.
- (11) Giraldo, A. L.; Peñuela, G. A.; Torres-Palma, R. A.; Pino, N. J.; Palominos, R. A.; Mansilla, H. D. Degradation of the antibiotic oxolinic acid by photocatalysis with TiO<sub>2</sub> in suspension. *Water Res.* **2010**, *44* (18), 5158-5167; DOI: 10.1016/j.watres.2010.05.011.
- (12) Chen, Y. X.; Yang, S. Y.; Wang, K.; Lou, L. P. Role of primary active species and TiO<sub>2</sub> surface characteristic in UV-illuminated photodegradation of Acid Orange 7. *J. Photochem. Photobio. A-Chem* **2005**, *172* (1), 47-54; DOI 10.1016/j.jphotochem.2004.11.006.
- (13) Chen, Y. M.; Lu, A. H.; Li, Y.; Zhang, L. S.; Yip, H. Y.; Zhao, H. J.; An, T. C.; Wong, P. K. Naturally occurring sphalerite as a novel cost-effective photocatalyst for bacterial disinfection under visible light. *Environ. Sci. Technol.* **2011**, *45* (13), 5689-5695; DOI 10.1021/es200778p.
- (14) Cho, M.; Chung, H.; Choi, W.; Yoon, J. Linear correlation between inactivation of *E. coli* and OH radical concentration in TiO<sub>2</sub> photocatalytic disinfection. *Water Res.* **2004**, *38* (4), 1069-1077; DOI 10.1016/j.watres.2003.10.029.
- (15) Zhang, L. S.; Wong, K. H.; Yip, H. Y.; Hu, C.; Yu, J. C.; Chan, C. Y.; Wong, P. K. Effective photocatalytic disinfection of *E. coli* K-12 using AgBr-Ag-Bi<sub>2</sub>WO<sub>6</sub> nanojunction system irradiated by visible light: The Role of Diffusing Hydroxyl Radicals. *Environ. Sci. Technol.* **2010**, *44* (4), 1392-1398; DOI 10.1021/es903087w.
